# Supplementary material
Source: MDPI journal article supplement (https://www.mdpi.com/2227-9717/10/9/1880)
Supplement: s1 [file s1]

## Supplementary Material

# Protective Effect of Ultrasound-Processed Amazonian Sapota-do-Solimões (*Quararibea cordata*) Juice on *Artemia salina* Nauplii

Rhonyele Maciel da Silva<sup>1</sup>, Thaiz Batista Azevedo Rangel Miguel<sup>2</sup>, Emilio de Castro Miguel<sup>3</sup>, Pedro Henrique Campelo<sup>4</sup>, Fabiano A. N. Fernandes<sup>1</sup> and Sueli Rodrigues<sup>2,\*</sup>

<sup>1</sup> Chemical Engineering Department, Federal University of Ceará, Campus do Pici Bloco 709, CEP 60440-900- Fortaleza-CE-BRAZIL

<sup>2</sup> Food Engineering Department, Federal University of Ceará, Campus do Pici Bloco 851, CEP 60-440-900- Fortaleza-CE-BRAZIL

<sup>3</sup> Department of Metallurgical Engineering and Materials Science, Federal University of Ceará, Campus do Pici Bloco 729, CEP 60-440-900- Fortaleza-CE-BRAZIL

<sup>4</sup> Department of Food Technology, Federal University of Viçosa, CEP 36570-900, Viçosa-MG-BAZIL

\* Correspondence: sueli@ufc.br

**Table S1.** Acute toxicity of unprocessed and ultrasound processed (2, 6, and 10 min) sapota-do-Solimões juice (10, 100, and 1000 µg.mL<sup>-1</sup>) in *Artemia salina* nauplii at 24 h and 48 h of exposure.

| Sample/Time of experiment                          | Number of dead <i>Artemia salina</i> nauplii |        |
|----------------------------------------------------|----------------------------------------------|--------|
|                                                    | 24 h                                         | 48 h   |
| Seawater                                           | 0 ± 0                                        | 0 ± 0  |
| K <sub>2</sub> Cr <sub>2</sub> O <sub>7</sub> 0.5M | 10 ± 0                                       | 10 ± 0 |
| Juice 10 µg.mL <sup>-1</sup>                       | 0 ± 0                                        | 0 ± 0  |
| Juice 100 µg.mL <sup>-1</sup>                      | 0 ± 0                                        | 0 ± 0  |
| Juice 1000 µg.mL <sup>-1</sup>                     | 0 ± 0                                        | 0 ± 0  |
| Juice UL2 10 µg.mL <sup>-1</sup>                   | 0 ± 0                                        | 0 ± 0  |
| Juice UL2 100 µg.mL <sup>-1</sup>                  | 0 ± 0                                        | 0 ± 0  |
| Juice UL2 1000 µg.mL <sup>-1</sup>                 | 0 ± 0                                        | 0 ± 0  |
| Juice UL6 10 µg.mL <sup>-1</sup>                   | 0 ± 0                                        | 0 ± 0  |
| Juice UL6 100 µg.mL <sup>-1</sup>                  | 0 ± 0                                        | 0 ± 0  |
| Juice UL6 1000 µg.mL <sup>-1</sup>                 | 0 ± 0                                        | 0 ± 0  |
| Juice UL10 10 µg.mL <sup>-1</sup>                  | 0 ± 0                                        | 0 ± 0  |
| Juice UL10 100 µg.mL <sup>-1</sup>                 | 0 ± 0                                        | 0 ± 0  |
| Juice UL10 1000 µg.mL <sup>-1</sup>                | 0 ± 0                                        | 0 ± 0  |
